# Supplementary material for: Human Milk Microbiota Profile Affected by Prematurity in Argentinian Lactating Women
Source: MDPI journal article supplement (doi:10.3390/microorganisms11041090), 2023-04-21
Supplement: s1 [file s1]

## Supplementary methods

### *Data analysis*

Raw sequences were processed using a modified version of the pipeline proposed by Logares <sup>1</sup>, described above. Reads were first analyzed for error correction using the algorithms based on Hamming graphs and Bayesian subclustering (BAYES HAMMER tool) <sup>2</sup> implemented in SPAdes v3.5.0 <sup>3</sup>. Then a quality check was performed using fastq\_filter in USEARCH-v10 <sup>4</sup>. Reads that passed the quality control were analyzed using UNOISE2 <sup>5</sup> to define operational taxonomic units (OTUs) with no clustering (zero-radius OTUs [zOTUs]) <sup>6</sup>. The zOTU table was created with the function otutab in USEARCH-v10 <sup>7</sup>. OTUs identified as contaminants from the sequencing controls were also removed. Finally, taxonomy assignment of zOTUs was done by BLAST <sup>8</sup>, using the SILVA database (SSU Ref 132 NR 99) as a reference. zOTUs  $\leq 10$  reads were removed.

### References

1. Logares R. ramalok/amplicon\_processing: Workflow for Analysing MiSeq Amplicons based on Uparse. 2017 DOI: <http://doi.org/10.5281/zenodo.259579>
2. Nikolenko SI, Korobeynikov AI, Alekseyev MA. BayesHammer: Bayesian clustering for error correction in single-cell sequencing. BMC Genomics. 2013;14(Suppl 1):S7.
3. Nurk S, Bankevich A, Antipov D, et al. Assembling Single-Cell Genomes and Mini-Metagenomes From Chimeric MDA Products. Journal of Computational Biology. 2013 Oct;20(10):714–37.
4. Edgar RC, Flyvbjerg H. Error filtering, pair assembly and error correction for next-generation sequencing reads. Bioinformatics. 2015 Nov;31(21):3476–82.
5. Edgar RC. UNOISE2: improved error-correction for Illumina 16S and ITS amplicon sequencing. bioRxiv. 2016 DOI: <https://doi.org/10.1101/081257>
6. Edgar RC. Updating the 97% identity threshold for 16S ribosomal RNA OTUs. Bioinformatics. 2018 Jul;34(14):2371–5.
7. Edgar RC, Flyvbjerg H. Error filtering, pair assembly and error correction for next-generation sequencing reads. Bioinformatics. 2015 Nov;31(21):3476–82.
8. Altschul SF, Gish W, Miller W, et al. Basic local alignment search tool. Journal of Molecular Biology. 1990 Oct;215(3):403–10.

Supplementary material.

Supplementary S1.

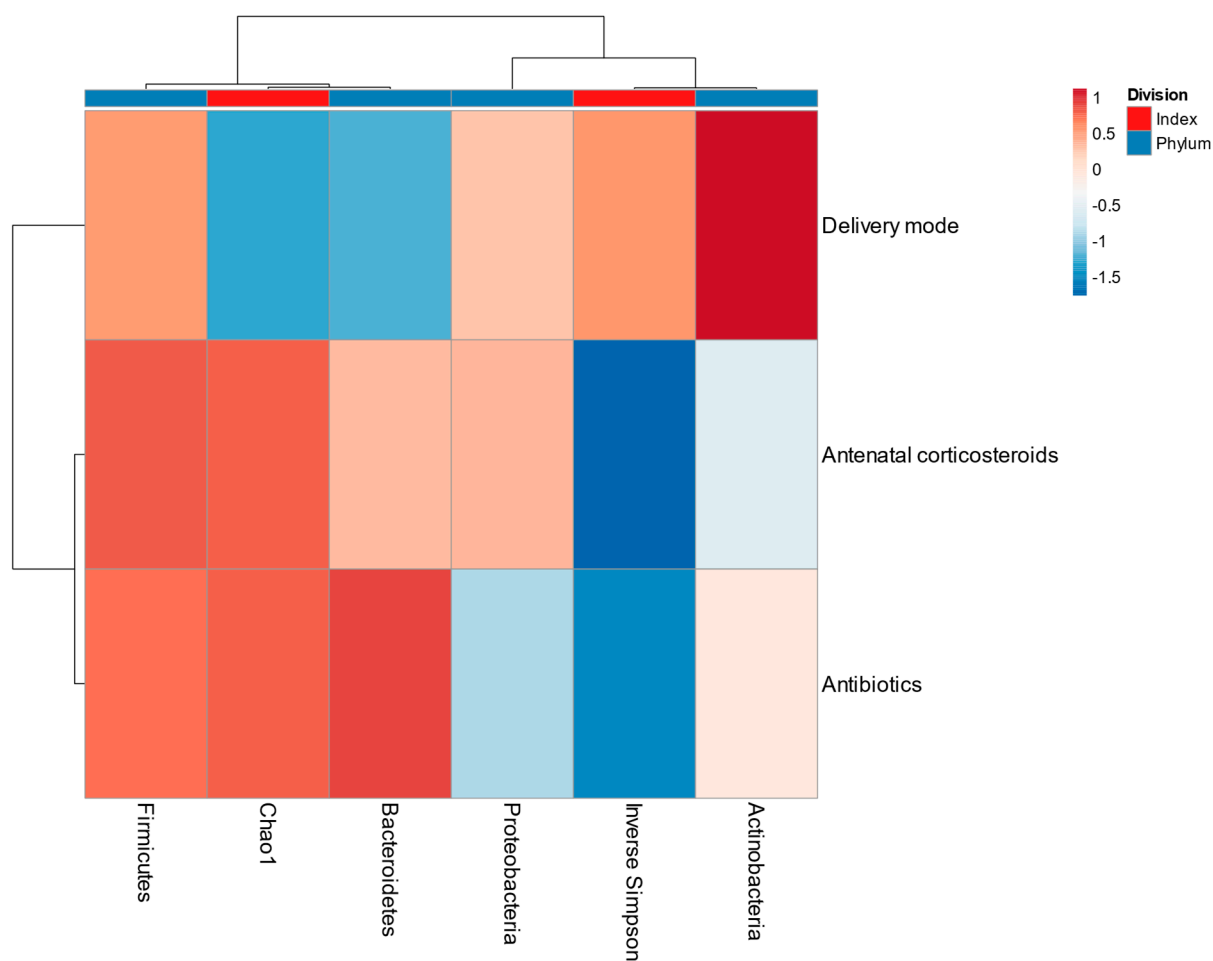

**Figure S1.** Clinical data association with milk microbiota composition at phylum and alpha diversity indices. Delivery mode: Cesarean section/Vaginal. Prenatal administration of antibiotics and corticoids: Yes/No.  $\beta$  coefficients of univariate associations with linear regression are visualized for taxa abundance and alpha diversity index value. \* $p < 0.05$ , \*\* $p < 0.001$ .

**Table S1.** Regression coefficients and significances of clinical data association with milk microbiota at phylum, genera levels, and alpha diversity indices.

|                                                     | $\beta$ | p value |
|-----------------------------------------------------|---------|---------|
| Delivery mode vs. Actinobacteria phylum             | 0.124   | 0.484   |
| Delivery mode vs. Bacteroidetes phylum              | -0.154  | 0.384   |
| Delivery mode vs. Firmicutes phylum                 | 0.052   | 0.771   |
| Delivery mode vs. Proteobacteria phylum             | 0.021   | 0.904   |
| Delivery mode vs. Chao1 index                       | -0.167  | 0.351   |
| Delivery mode vs. Inverse Simpson index             | 0.057   | 0.749   |
| Delivery mode vs. Shannon index                     | -0.005  | 0.976   |
| Antenatal Corticosteroids vs. Actinobacteria phylum | -0.079  | 0.659   |
| Antenatal Corticosteroids vs. Bacteroidetes phylum  | 0.063   | 0.663   |
| Antenatal Corticosteroids vs. Firmicutes phylum     | 0.137   | 0.441   |
| Antenatal Corticosteroids vs. Proteobacteria phylum | 0.065   | 0.716   |
| Antenatal Corticosteroids vs. Chao1 index           | 0.133   | 0.455   |
| Antenatal Corticosteroids vs. Inverse Simpson index | -0.259  | 0.125   |
| Antenatal Corticosteroids vs. Shannon index         | -0.064  | 0.718   |
| Antibiotics vs. Actinobacteria phylum               | -0.004  | 0.984   |
| Antibiotics vs. Bacteroidetes phylum                | 0.171   | 0.334   |
| Antibiotics vs. Firmicutes phylum                   | 0.139   | 0.538   |
| Antibiotics vs. Proteobacteria phylum               | -0.154  | 0.383   |
| Antibiotics vs. Chao1 index                         | 0.152   | 0.391   |
| Antibiotics vs. Inverse Simpson index               | -0.262  | 0.134   |
| Antibiotics vs. Shannon index                       | -0.121  | 0.495   |

**Table S2.** Clinical data of the mother-child pair

| <b>Parameter</b>                                  | <b>Preterm</b> | <b>Term</b>    | <b>P value</b>     |
|---------------------------------------------------|----------------|----------------|--------------------|
| <b>Number of samples</b>                          | 24             | 12             | Not applicable     |
| <b>Number of mothers</b>                          | 12             | 12             | Not applicable     |
| <b>Days postpartum, 1st sample</b>                | 8 ± 3          | 8 ± 3          | 0,799 <sup>2</sup> |
| <b>Days postpartum, 2nd sample</b>                | 22 ± 9         | Not applicable | Not applicable     |
| <b>Relation vaginal/Caesarean section</b>         | 3:09           | 4:08           | Not applicable     |
| <b>% Caesarean section</b>                        | 75 (9:12)      | 67 (8:12)      | Not applicable     |
| <b>Gestational age (weeks)</b>                    | 33,4 ± 1,2     | 38,3 ± 1,2     | 0,000 <sup>1</sup> |
| <b>Neonatal weight (g) at birth</b>               | 1968 ± 308     | 2925 ± 484     | 0,000 <sup>1</sup> |
| <b>Neonate Sex (M/F)</b>                          | 6:06           | 5:07           | Not applicable     |
| <b>Age (years) of mothers</b>                     | 25,7 ± 7,5     | 29,1 ± 8,2     | 0,300 <sup>1</sup> |
| <b>Allergies of mothers (Yes / No)</b>            | 5:07           | 4:07           | Not applicable     |
| <b>Diabetes before pregnancy (Yes / No)</b>       | 0:12           | 1:11           | Not applicable     |
| <b>Hypo / Hyper Thyroidism (Yes / No)</b>         | 2:10           | 1:11           | Not applicable     |
| <b>Anemia during pregnancy (Yes / No)</b>         | 2:10           | 2:10           | Not applicable     |
| <b>Gestational diabetes (Yes / No)</b>            | 2:10           | 2:10           | Not applicable     |
| <b>Antenatal corticosteroids (Yes / No)</b>       | 11:01          | 2:10           | Not applicable     |
| <b>Antibiotics (Yes / No)</b>                     | 10:02          | 7:05           | Not applicable     |
| <b>Active smoker during pregnancy (Yes / No)</b>  | 2:10           | 2:10           | Not applicable     |
| <b>Passive smoker during pregnancy (Yes / No)</b> | 5:07           | 3:09           | Not applicable     |

<sup>1</sup> Student's T-test for independent samples for parametric data

<sup>2</sup> Mann-Whitney U test for non-parametric data

\* p < 0.05, significant
